# Supplementary material
Source: ML conference proceedings conference paper supplement (https://openaccess.thecvf.com/content/CVPR2024/html/Yu_HalluciDoctor_Mitigating_Hallucinatory_CVPR_2024_paper.html)
Supplement: Supplementary file 1 [file Yu_HalluciDoctor_Mitigating_Hallucinatory_CVPR_2024_supplemental.pdf]

# HalluciDoctor: Mitigating Hallucinatory Toxicity in Visual Instruction Data

## Supplementary Material

### A. Overview

In this supplementary material, we present:

- More detailed analysis of HalluciDoctor (Section B).
- More experimental analysis (Section C).
- Additional examples (Section D).

### B. HalluciDoctor Framework

#### B.1. Question Generation

This section provides specific steps for answer-based question generation. We utilize ChatGPT [13] as the powerful question generator, covering a broad spectrum of semantic chunks and various question types. Specifically, we construct the prompt template shown in Figure 1 (a), filling the context description and answer blocks into slots to generate all corresponding questions. These questions, covering various types, effectively reflect meaningful semantic information in the descriptions.

#### B.2. Consistency Cross-checking Analysis

Considering the importance of the threshold in consistency cross-checking for identifying hallucinatory chunks, we further explore the effect of consistency cross-checking under different threshold setups in Table 1. Here, we assess the impact of different consistency thresholds by evaluating the average performance on CHAIR and MME benchmarks.

Our observations indicate that at lower consistency thresholds, as the threshold increases, hallucinatory descriptions are progressively detected and eliminated. This provides MLLMs with higher-quality instruction data for fine-tuning, thereby reducing the likelihood of hallucinatory outputs while enhancing model performance. However, when the consistency threshold exceeds 0.5, there’s a significant decline in model performance. The possible reason is that HalluciDoctor eliminates almost all answer blocks as hallucinations when the consistency threshold is too high, resulting in a substantial loss of accurate semantics. Therefore, to effectively reduce hallucinations in MLLM outputs while ensuring competitive performance, we select **0.5** as the final threshold for the consistency cross-checking stage in our HalluciDoctor framework. To enhance the precision of hallucination detection and elimination, we will explore more advanced approaches for computing consistency scores [2, 17] in the future.

#### B.3. Hallucination Elimination

This section provides specific steps for hallucination elimination in the visual instruction data. To eliminate detected

| Consistency threshold | w/o HalluciDoctor | 0.1    | 0.3           | 0.5           | 0.7    | 0.9         |
|-----------------------|-------------------|--------|---------------|---------------|--------|-------------|
| CHAIR (%) ↓           | 21.7              | 19.9   | 16.1          | <u>13.8</u>   | 14.2   | <b>13.6</b> |
| MME performance (%) ↑ | 1148.9            | 1153.2 | <u>1178.6</u> | <b>1207.2</b> | 1012.9 | 739.1       |

Table 1. The influence of different consistency threshold for the hallucination elimination in visual instruction data.

hallucinations while preserving meaningful semantics in the original descriptions, we employ ChatGPT to refine the descriptions. Specifically, we input both the hallucinatory phrases and the original descriptions into the prompt template shown in Figure 1 (b), prompting ChatGPT to remove hallucinatory phrases without altering the sentence structure. We also show some examples in Figure 1 (b). These refined descriptions are then employed to update the visual instructions in LLaVA, efficiently creating the rectified dataset LLaVA++.

#### B.4. Visual Instruction Expansion

This section provides detailed steps for selecting target images and how to add hallucinatory objects into target scenes. Firstly, we filter target scenes based on object detection to ensure the specific hallucinatory object  $o$  is absent. We then generate candidate objects and their corresponding masks for counterfactual image synthesis using text-to-image models [14, 16] and object detection tools [11]. Subsequently, we provide the LLM with image sizes and foreground object locations of target scenes to enable it to determine suitable positions and scaling. Finally, we employ structure-preserving filtering based on the depth map L1 distance for natural image incorporation.

In this way, counterfactual instruction expansion focuses on detailed and unusual instruction modifications, necessitating MLLMs to perceive fine-grained concepts for comprehensive instruction alignment. Consequently, it will generate fewer hallucinations (*e.g.*, 13.8% → 12.0% in MiniGPT-4) and demonstrate superior proficiency in perceiving specific information (*e.g.*, shop’s name). This approach can also alleviate the adverse impact of long-tail distributions in various domains [19].

### C. More Experimental Analysis

#### C.1. Experiment Details

**Implementation Details.** As for MiniGPT4, we initialize from its checkpoint of the first pretraining stage and only fine-tune the linear projection layer of the model for 10000 steps. As for mPLUG-Owl, we train the text encoder with

| Dataset       | Accuracy    | F1          | Dataset       | Accuracy    | F1          | Dataset       | Accuracy    | F1          |
|---------------|-------------|-------------|---------------|-------------|-------------|---------------|-------------|-------------|
| w/ LLaVA [10] | 75.1        | 77.8        | w/ LLaVA [10] | 65.6        | 71.7        | w/ LLaVA [10] | 63.2        | 70.5        |
| w/ LRV [9]    | 64.4        | 72.6        | w/ LRV [9]    | 63.4        | 72.3        | w/ LRV [9]    | 60.7        | 70.6        |
| w/ LLaVA+     | 79.1        | 80.0        | w/ LLaVA+     | 74.0        | 75.3        | w/ LLaVA+     | 68.5        | 72.0        |
| w/ LLaVA++    | <b>80.1</b> | <b>80.4</b> | w/ LLaVA++    | <b>76.3</b> | <b>75.9</b> | w/ LLaVA++    | <b>71.9</b> | <b>74.2</b> |

(a) Random Setting                      (b) Popular Setting                      (c) Adversarial Setting

Table 2. Zero-shot object hallucination results for MiniGPT-4 [21] fine-tuned with various visual instructions on POPE [9] evaluation. We follow the official setup, which involves using three different strategies (*i.e.*, random, popular, and adversarial setting) to sample objects not present in the images and then computing the corresponding accuracy and F1 scores.

the LoRA [3] strategy and prepare for 4000 steps. Due to limited computing resources, we set the micro-batch size to 4 and only fine-tuned the 7B model with NVIDIA RTX 3090. To make a fair comparison in our experiments, we only change the visual instruction data under different setups and keep other parameters the same as original models.

**Evaluation Setups.** MSCOCO [8] is a comprehensive dataset with 80 object categories used for diverse vision tasks. Visual Genome [5] is another vision dataset with more detailed visual information like bounding boxes and region captions. We select the overlapped images from MSCOCO and VG to construct validation images, aiming to encompass annotations of various objects, relationships, and attributes. Additionally, we employ powerful visual foundation models [6, 11, 18] to identify objects, relations, and attributes of images in the validation set, thereby enriching the ground truth labels. In the validation stage, we will extract object, relation, and attribute phrases from the description of MLLMs that are fine-tuned on different visual instruction datasets, and calculate the corresponding hallucinatory metrics by matching them to ground truth labels.

**GPT-4 Evaluation.** We show the GPT-4 evaluation’s prompt templates for detailedness and accuracy in Figure 2.

## C.2. POPE Results

We compare the MLLM fine-tuned on our more robust dataset LLaVA+ and LLaVA++ against the baseline dataset on POPE evaluation [7] in Table 2. Although POPE is tailored for close-ended questions of object hallucinations, rendering it unsuitable for our comprehensive evaluation of various hallucinations in visual instruction data, our approach also shows a similar tendency to our main results that LLaVA+ and LLaVA++ from HalluciDoctor achieve consistent gains in all accuracy and F1 score. The results indicate that HalluciDoctor is effective in correcting object-level hallucinations. In addition, the MLLM fine-tuned on LLaVA++ obtains the highest accuracy and F1 score, demonstrating that the more robust visual instruction dataset can enhance MLLMs’ ability to discern negative instructions, especially in the more challenging adversarial setting.

| Dataset           | Captioning     |             | VQA         |  |
|-------------------|----------------|-------------|-------------|--|
|                   | NoCaps (val) ↑ | GQA ↑       | AOK-VQA ↑   |  |
| Faithful Prompt   | 101.5          | 40.5        | 56.1        |  |
| LURE [20]         | 93.9           | 41.4        | 58.3        |  |
| VIGC [15]         | 96.6           | 41.0        | 58.9        |  |
| MiniGPT4+LRV [9]  | 103.9          | 40.7        | 57.6        |  |
| MiniGPT4+LLaVA++  | 104.1          | <b>43.7</b> | 60.1        |  |
| mPLUG-Owl+LLaVA++ | <b>104.4</b>   | 43.3        | <b>61.0</b> |  |

Table 3. Overview performance comparison on conventional zero-shot vision-language tasks (*i.e.*, captioning, VQA).

## C.3. Zero-shot Vision-Language Task Results

As a versatile MLLM, the model’s performance cannot be compromised by instruction fine-tuning. On the contrary, by eliminating hallucinatory information in the training data, the MLLM demonstrates stronger generalization capabilities for conventional visual tasks. We perform the quantitative evaluation on the zero-shot vision-language tasks based on captioning (NoCaps [1]) and visual question answering (GQA [4], AOK-VQA [12]). Table 3 provides an overview of the performance of HalluciDoctor on various zero-shot vision-language tasks. Compared to other works on hallucination elimination, our method achieves better generalization performance on traditional vision tasks.

## D. Additional Examples

### D.1. Evaluation of Visual Instruction Data

**Dataset visualization.** Figure 3 shows some more visualized examples in the rectified dataset LLaVA+ and more robust dataset LLaVA++.

**Dataset evaluation.** Similar to Sec. 5.5, we perform a manual evaluation of the generated data for more accurate results. We sample 200 instructions from LLaVA+ and LLaVA, assessing their accuracy and quality. LLaVA+ not only shows higher accuracy scores than LLaVA (451 v.s. 371) but also maintains comparable quality (405 v.s. 412).

### D.2. MLLMs’ Inference Analysis

We compare the outputs of MiniGPT-4 [21] fine-tuned on LLaVA [10], LRV-Instruction [9], LLaVA+, and LLaVA++ on various types of images and show the visualized re-

sults in Figure 4. The results verified that LLaVA+ effectively helped MLLMs eliminate hallucinatory descriptions, and LLaVA ++ further added reliable detailed descriptions.

## Answer-based Question Generation

You are a language assistant that helps to generate appropriate questions according to the given answer chunks and the context description.

Examples:

Description:

Please give me meaningful and answerable questions corresponding to the following answers based on the given context to help me understand the context. Please ensure that each question doesn't involve 'How many' and is concise to exactly match the corresponding answer.

Answer:

["sky is cloudy", "man fish on lawn", "man next to river", "man in background", "trees on side of river"]

Question:

1. What is the current weather condition?
  2. Where is the man fishing?
  3. What is the man's proximity to the river?
  4. Who can be seen in the background?
  5. What can be observed on the other side of the river?
- ...

Description:

{*description*}

Please give me meaningful and answerable questions corresponding to the following answers based on the given context to help me understand the context. Please ensure that each question doesn't involve 'How many' and is concise to exactly match the corresponding answer.

Answer:

{*answer*}

(a) The details of the prompt design for *Question Generation* in HalluciDoctor.

## Hallucination Elimination

You are a language assistant that helps to refine a passage with wrong phrases removed. Given a passage and wrong phrases, you are required to remove all of them in the passage and output the refined passage in a fluent and natural style, following these rules:

1. Try to remove wrong phrases and do not use other phrases to replace

Examples:

Passage:

In addition to the sandwiches of various sizes, a bowl, a cup, and a spoon can be seen on the table, suggesting that the guests are sharing food and drinks.

Wrong phrases:

['spoon', 'drinks', 'sandwiches is various sizes']

Refined passage:

In addition to the sandwiches, a bowl and a cup can be seen on the table, suggesting that the guests are sharing food.

Passage:

The image depicts a scene of two giraffes standing on a dirt road near a fence. There are three cars parked in the background, with one on the left side and two more on the right side.

Wrong phrases:

['cars', 'cars are three']

Refined passage:

The image depicts a scene of two giraffes standing on a dirt road near a fence.

Passage:

{*passage*}

Wrong phrases:

{*hallucination phrase*}

Refined passage:

(b) The details of the prompt design for *Hallucination Elimination* in HalluciDoctor.

Figure 1. The details of the prompt design in HalluciDoctor. There are injectable slots in the prompts, such as *description*, *answer*, *passage*, and *hallucination phrase*. These slots are uniformly replaced with the corresponding text before being fed into the LLM.

## GPT-4 Evaluation-Detailedness

Suppose you are an image detail annotator who judges the degree of sentence diversity based on the number of objects, relations, and attributes.

Please just provide the diversity score(1-5) for the below descriptions without any explanation, where longer caption with more content give a higher diversity score. The output format: [x,...]

Descriptions:

caption 1: {description\_1}

caption 2: {description\_2}

caption 3: {description\_3}

caption 4: {description\_4}

caption 5: {description\_5}

Output:

## GPT-4 Evaluation-Accuracy

Suppose you are a hallucination annotator who judges the degree of hallucination based on the number of errors in the description of objects, relations, and attributes, and you have the following real image information.

Reference captions: {coco\_captions}

Bounding box: {bounding\_box}

Please just provide the hallucination score(1-5) for the below descriptions without any explanation, where the fewer descriptive errors in the caption, the higher the hallucination score given. The output format: [x,...]

Descriptions:

caption 1: {description\_1}

caption 2: {description\_2}

caption 3: {description\_3}

caption 4: {description\_4}

caption 5: {description\_5}

Output:

Figure 2. The details of the prompt design for GPT-4 evaluations.

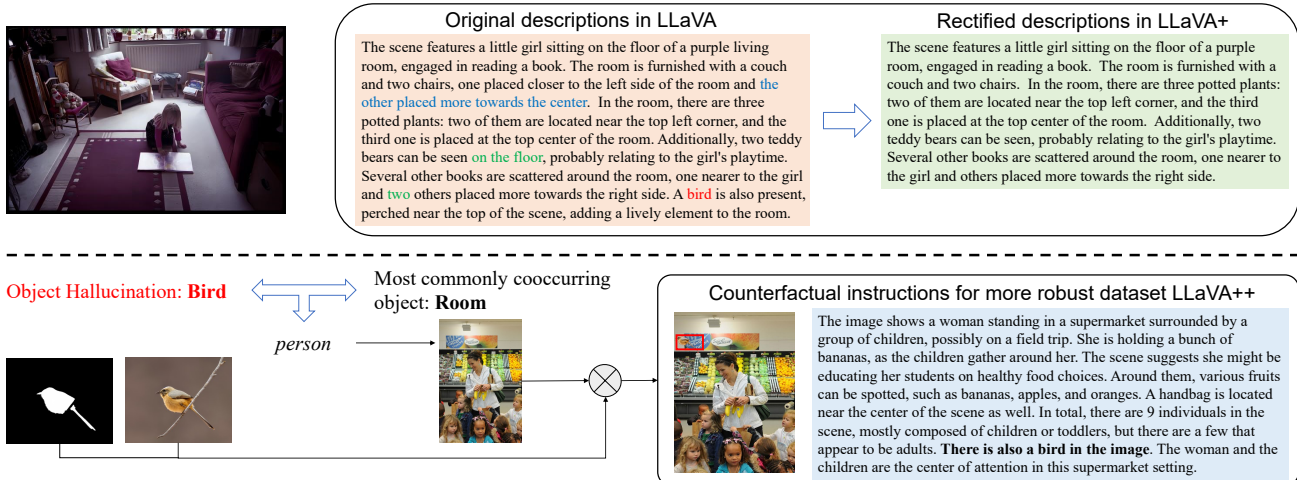

Figure 3. The instruction data visualization of LLaVA+ after hallucination elimination and LLaVA++ after visual instruction expansion.

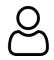

Which city is this? Why do you think so?

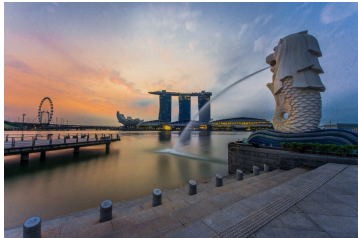

|                                                                                                                                                                                                                                                                                                                                                                                                                                                                                                                                                                      |   |                                                                                                                                                                                                                                                                                                                                                                                                                                                                                                                                                                                                                             |
|----------------------------------------------------------------------------------------------------------------------------------------------------------------------------------------------------------------------------------------------------------------------------------------------------------------------------------------------------------------------------------------------------------------------------------------------------------------------------------------------------------------------------------------------------------------------|---|-----------------------------------------------------------------------------------------------------------------------------------------------------------------------------------------------------------------------------------------------------------------------------------------------------------------------------------------------------------------------------------------------------------------------------------------------------------------------------------------------------------------------------------------------------------------------------------------------------------------------------|
| <p><b>Too many hallucinations!</b></p> <p> This image depicts a unique and beautiful scene of Singapore. The scenery is accompanied by two impressive fountains: one located at the pier with its towering spout shooting water towards the sky while another can be found closer to shore in front of several boats bobbing around it. A longboard surfer cruises alongside these waterspouts throughout most parts of this lively setting that reflects both pastel colors from dusk light and vibrant hues near sunset time!</p> <p><i>MiniGPT-4 w/ LLaVA</i></p> | ➔ | <p><b>More accurate with hallucination elimination!</b></p> <p> This image features the Singapore located in the Pacific Ocean, known for its unique skyline and iconic landmark structures. The scene features a water fountain in the foreground, with Marina Bay Sands' Merlion statue visible near it. This area appears to be situated by Singapore River and is likely an iconic location that people might want their picture taken next. In the distance lies an amusement park, basked in the sunset glow over the waters of Singapore.</p>                                                                        |
| <p><b>Too simple and general description!</b></p> <p> This is in Malaysia. The water is coming out from a fountain at the side of buildings.</p> <p><i>MiniGPT-4 w/ LRV</i></p>                                                                                                                                                                                                                                                                                                                                                                                      | ➔ | <p><b>More details but with much fewer hallucinations!</b></p> <p> This image depicts a unique and beautiful scene of Singapore, featuring the iconic Merlion statue on a lakefront called Marina Bay. Based on the image, it appears that there are several water jets coming out of the iconic Merlion statue. Across the lakefront, there is an amusement park for people walking around and enjoying their time in Singapore. Additionally towers can be seen providing unique visual appeal for visitors attending Merlion Park – one known as Marina Bay Financial Centre Tower topped by a boat-shaped sky park.</p> |

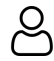

Tell me about this work of art.

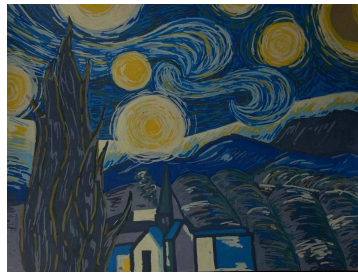

|                                                                                                                                                                                                                                                                                                                                                                                                                                                                                                                                                                          |   |                                                                                                                                                                                                                                                                                                                                                                                                                                                                                                                                                                                                                                                 |
|--------------------------------------------------------------------------------------------------------------------------------------------------------------------------------------------------------------------------------------------------------------------------------------------------------------------------------------------------------------------------------------------------------------------------------------------------------------------------------------------------------------------------------------------------------------------------|---|-------------------------------------------------------------------------------------------------------------------------------------------------------------------------------------------------------------------------------------------------------------------------------------------------------------------------------------------------------------------------------------------------------------------------------------------------------------------------------------------------------------------------------------------------------------------------------------------------------------------------------------------------|
| <p><b>Too many hallucinations!</b></p> <p> The image appears to be a painting of the famous Starry Night by Vincent van Gogh. It depicts his iconic representation with multiple stars and an orange skyline, along with houses in various locations surrounding it - including one nearby at lower left corner as well another near center-right area on canvas. The vineyard under snowy sky and golden field is also present above some buildings towards upper right side. There also exists poppies among wheat and cypresses.</p> <p><i>MiniGPT-4 w/ LLaVA</i></p> | ➔ | <p><b>More accurate with hallucination elimination!</b></p> <p> The image features a painting of the famous Vincent Van Gogh masterpiece, The Starry Night. The painting is displayed against a plain background, showcasing the artist's skill in capturing the essence of a dark, starry night with bold strokes of vivid colors. The scene is enhanced by a subtle glow of light coming from the sky, adding a sense of depth and drama to the painting. The overall impression is one of peacefulness and beauty.</p>                                                                                                                       |
| <p><b>Too simple and general description!</b></p> <p> This is an abstract piece of art depicting a starry night sky with mountains and buildings in the background. The painting style uses bold colors such as blue, yellow, black to create its effect on canvas.</p> <p><i>MiniGPT-4 w/ LRV</i></p>                                                                                                                                                                                                                                                                   | ➔ | <p><b>More details but with much fewer hallucinations!</b></p> <p> The Starry Night by Vincent van Gogh, painted in 1889. This painting is part of the art collection at MOMA (Museum Of Modern Art) and depicts a night view with swirling stars above an isolated town situated on two hills to its left side while behind it rises another hill covered partially underneath light clouds as if being observed from close quarters. The painting is renowned for its bold color, emotional honesty, and the swirling patterns of the stars that create a dynamic sky over a tranquil village. It is one of van Gogh's most famous works.</p> |

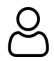

Provide a detailed description of the given image.

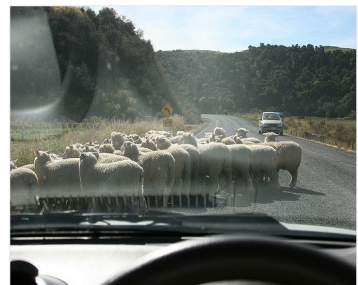

|                                                                                                                                                                                                                                                                                                                                                                                                                                                                                     |   |                                                                                                                                                                                                                                                                                                                                                                                                                                                                                                                                                                                                                    |
|-------------------------------------------------------------------------------------------------------------------------------------------------------------------------------------------------------------------------------------------------------------------------------------------------------------------------------------------------------------------------------------------------------------------------------------------------------------------------------------|---|--------------------------------------------------------------------------------------------------------------------------------------------------------------------------------------------------------------------------------------------------------------------------------------------------------------------------------------------------------------------------------------------------------------------------------------------------------------------------------------------------------------------------------------------------------------------------------------------------------------------|
| <p><b>Too many hallucinations!</b></p> <p> The image depicts a herd of sheep being herded along a country road by a person on a horse. There are several sheep scattered across the road, while the horse rider leads them towards a fence on the horizon. A car is also visible on the left side of the image, passing behind a few sheep. It seems that this is a peaceful and routine moment for the herd as they graze along the roadside.</p> <p><i>MiniGPT-4 w/ LLaVA</i></p> | ➔ | <p><b>More accurate with hallucination elimination!</b></p> <p> The image features a herd of sheep walking across a rural road, as a car drives by them. There are approximately 15 sheep in the scene, spread out across the road in a line, with some more focused on the car driving towards them. The car is visible in the foreground, passing through the group of sheep. The sheep are peacefully following each other and seem to be aware of the car. The road is surrounded by grasses and trees, adding to the rural atmosphere of the scene.</p>                                                       |
| <p><b>Too simple and general description!</b></p> <p> The image shows a group of white sheep crossing the road, with cars driving by them. There is also an open window on the passenger side and trees along the roadside.</p> <p><i>MiniGPT-4 w/ LRV</i></p>                                                                                                                                                                                                                      | ➔ | <p><b>More details but with much fewer hallucinations!</b></p> <p> The image shows a large herd of sheep walking down a road. They are spread across the road, covering a significant portion of the scene. There are several cars with the sheep, where one car at the very front of the herd and others behind it. A person is driving the car, likely watching over the sheep as they cross the road. A yellow sign can be seen on the side of the road. There is also a hill with some trees in the background. The sheep are moving at a steady pace, creating a scene that is both peaceful and chaotic.</p> |

Figure 4. More visualization of MLLM comparison on various visual perception cases (multi-round conversation, single-round conversation, detailed description, etc.).

## References

- [1] Harsh Agrawal, Karan Desai, Yufei Wang, Xinlei Chen, Rishabh Jain, Mark Johnson, Dhruv Batra, Devi Parikh, Stefan Lee, and Peter Anderson. Nocaps: Novel object captioning at scale. In *Proceedings of the IEEE/CVF international conference on computer vision*, pages 8948–8957, 2019. 2
- [2] Shangbin Feng, Vidhisha Balachandran, Yuyang Bai, and Yulia Tsvetkov. Factkb: Generalizable factuality evaluation using language models enhanced with factual knowledge. *arXiv preprint arXiv:2305.08281*, 2023. 1
- [3] Edward J Hu, Yelong Shen, Phillip Wallis, Zeyuan Allen-Zhu, Yuanzhi Li, Shean Wang, Lu Wang, and Weizhu Chen. Lora: Low-rank adaptation of large language models. *arXiv preprint arXiv:2106.09685*, 2021. 2
- [4] Drew A Hudson and Christopher D Manning. Gqa: A new dataset for real-world visual reasoning and compositional question answering. In *Proceedings of the IEEE/CVF conference on computer vision and pattern recognition*, pages 6700–6709, 2019. 2
- [5] Ranjay Krishna, Yuke Zhu, Oliver Groth, Justin Johnson, Kenji Hata, Joshua Kravitz, Stephanie Chen, Yannis Kalantidis, Li-Jia Li, David A Shamma, et al. Visual genome: Connecting language and vision using crowdsourced dense image annotations. *International journal of computer vision*, 123(1):32–73, 2017. 2
- [6] Junnan Li, Dongxu Li, Silvio Savarese, and Steven Hoi. Blip-2: Bootstrapping language-image pre-training with frozen image encoders and large language models. *arXiv preprint arXiv:2301.12597*, 2023. 2
- [7] Yifan Li, Yifan Du, Kun Zhou, Jinpeng Wang, Wayne Xin Zhao, and Ji-Rong Wen. Evaluating object hallucination in large vision-language models. *arXiv preprint arXiv:2305.10355*, 2023. 2
- [8] Tsung-Yi Lin, Michael Maire, Serge Belongie, James Hays, Pietro Perona, Deva Ramanan, Piotr Dollár, and C Lawrence Zitnick. Microsoft coco: Common objects in context. In *European conference on computer vision*, pages 740–755. Springer, 2014. 2
- [9] Fuxiao Liu, Kevin Lin, Linjie Li, Jianfeng Wang, Yaser Yacoob, and Lijuan Wang. Aligning large multi-modal model with robust instruction tuning. *arXiv preprint arXiv:2306.14565*, 2023. 2
- [10] Haotian Liu, Chunyuan Li, Qingyang Wu, and Yong Jae Lee. Visual instruction tuning. *arXiv preprint arXiv:2304.08485*, 2023. 2
- [11] Shilong Liu, Zhaoyang Zeng, Tianhe Ren, Feng Li, Hao Zhang, Jie Yang, Chunyuan Li, Jianwei Yang, Hang Su, Jun Zhu, et al. Grounding dino: Marrying dino with grounded pre-training for open-set object detection. *arXiv preprint arXiv:2303.05499*, 2023. 1, 2
- [12] Kenneth Marino, Mohammad Rastegari, Ali Farhadi, and Roozbeh Mottaghi. Ok-vqa: A visual question answering benchmark requiring external knowledge. In *Proceedings of the IEEE/cvf conference on computer vision and pattern recognition*, pages 3195–3204, 2019. 2
- [13] OpenAI. ChatGPT. <https://openai.com/blog/chatgpt/>, 2023. 1
- [14] Robin Rombach, Andreas Blattmann, Dominik Lorenz, Patrick Esser, and Björn Ommer. High-resolution image synthesis with latent diffusion models. In *Proceedings of the IEEE/CVF Conference on Computer Vision and Pattern Recognition*, pages 10684–10695, 2022. 1
- [15] Bin Wang, Fan Wu, Xiao Han, Jiahui Peng, Huaping Zhong, Pan Zhang, Xiaoyi Dong, Weijia Li, Wei Li, Jiaqi Wang, et al. Vigc: Visual instruction generation and correction. *arXiv preprint arXiv:2308.12714*, 2023. 2
- [16] Qifan Yu, Juncheng Li, Wentao Ye, Siliang Tang, and Yuet-ing Zhuang. Interactive data synthesis for systematic vision adaptation via llms-aigcs collaboration. *arXiv preprint arXiv:2305.12799*, 2023. 1
- [17] Yuheng Zha, Yichi Yang, Ruichen Li, and Zhiting Hu. Alignment score: Evaluating factual consistency with a unified alignment function. *arXiv preprint arXiv:2305.16739*, 2023. 1
- [18] Wenqiao Zhang, Haochen Shi, Jiannan Guo, Shengyu Zhang, Qingpeng Cai, Juncheng Li, Sihui Luo, and Yuet-ing Zhuang. Magic: Multimodal relational graph adversarial inference for diverse and unpaired text-based image captioning. In *Proceedings of the AAAI Conference on Artificial Intelligence*, pages 3335–3343, 2022. 2
- [19] Wenqiao Zhang, Changshuo Liu, Lingze Zeng, Bengchin Ooi, Siliang Tang, and Yueting Zhuang. Learning in imperfect environment: Multi-label classification with long-tailed distribution and partial labels. In *Proceedings of the IEEE/CVF International Conference on Computer Vision*, pages 1423–1432, 2023. 1
- [20] Yiyang Zhou, Chenhang Cui, Jaehong Yoon, Linjun Zhang, Zhun Deng, Chelsea Finn, Mohit Bansal, and Huaxiu Yao. Analyzing and mitigating object hallucination in large vision-language models. *arXiv preprint arXiv:2310.00754*, 2023. 2
- [21] Deyao Zhu, Jun Chen, Xiaoqian Shen, Xiang Li, and Mohamed Elhoseiny. MiniGPT-4: Enhancing vision-language understanding with advanced large language models. *arXiv preprint arXiv:2304.10592*, 2023. 2
